# Supplementary material
Source: PubMed Central journal article supplement (PMC5883003)
Supplement: rstb20170100supp1.pdf [file rstb20170100supp1.pdf]

# Supplemental material for manuscript “From wetland specialist to hand-fed generalist: Shifts in diet and condition with provisioning for a recently urbanized wading bird”

**Authors: Maureen H. Murray<sup>\*1,2</sup>, Anjelika Kidd<sup>1,2</sup>, Shannon E. Curry<sup>1,2</sup>, Jeffrey Hepinstall-Cymerman<sup>1</sup>, Henry Adams<sup>1,2</sup>, Taylor Ellison<sup>1,2</sup>, Catharine Welch<sup>1,2</sup>, and Sonia M. Hernandez<sup>1,2</sup>**

<sup>1</sup> Warnell School of Forestry and Natural Resources, University of Georgia, Athens, GA, 30602, USA

<sup>2</sup> Southeastern Cooperative Wildlife Disease Study, College of Veterinary Medicine, University of Georgia, Athens, GA, 30602, USA

\* Corresponding author contact: [mhmurray@uga.edu](mailto:mhmurray@uga.edu)

Table S1. Land cover types defined by the Cooperative Land Cover classification for the state of Florida included in six categories used in our analysis. Definitions of land cover types can be accessed at: <http://myfwc.com/media/2815396/LandCoverClassification-2014.pdf>

| Land Cover Category | Cooperative Land Cover Classification types |
|---------------------|---------------------------------------------|
| Urban               | 1820 – 18225; 1832; 1840; 1850; 1860        |
| Wetland             | All 2000's; 3250;                           |
| Agriculture         | 1833 - 183324                               |
| Coastal             | 1600's, 5000's                              |
| Open water          | 6000's, 8000                                |
| Other Terrestrial   | 1000 – 1510; 7000's                         |

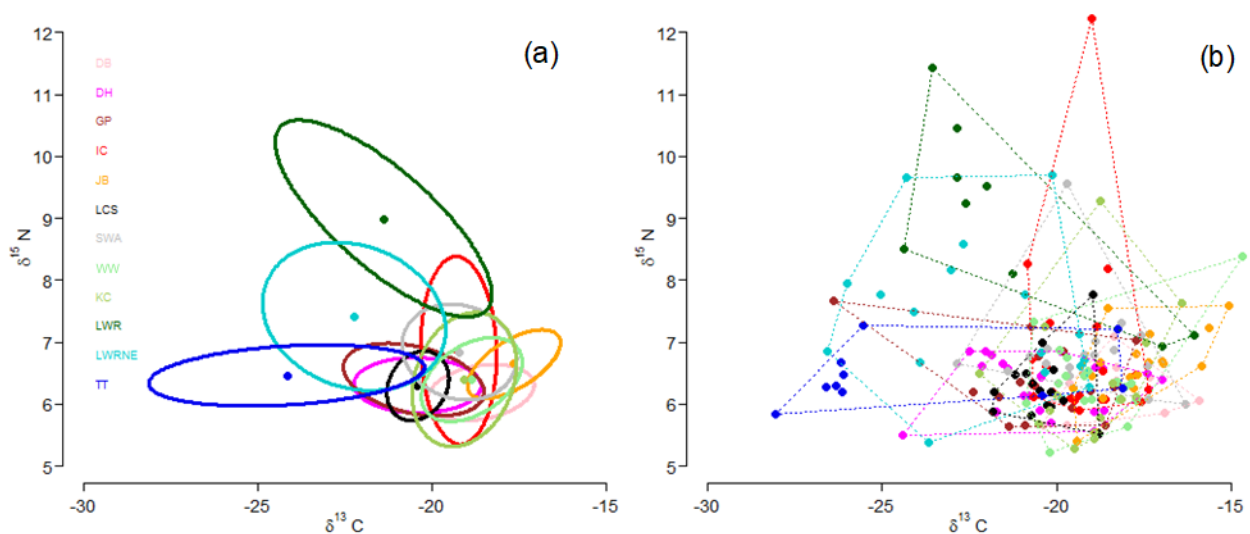

Figure S1. Stable isotope values of white ibises caught at 12 capture sites in south Florida and colored by capture site. Panel A shows standard 40% area ellipses (ovals) and centroid values (dots). Panel B shows all ibis values (dots) with convex hulls outlining the isotopic space of each capture site (dotted lines). Capture site abbreviations are DB (Dubois Park), DH (Dreher Park), GP (Gaines Park), IC (Indian Creek Park), JB (Juno Beach), LCS (Lion Country Safari), SWA (Solid Waste Authority), WW (Wakodahatchee Wetlands), KC (Kitching Creek), LWR (Loxahatchee Wildlife Refuge), LWRNE (Loxahatchee Wildlife Refuge Northeast Roost), TT (TetraTech constructed wetland) corresponding to Figure 1.

Summaries for all component models  $\leq 4$  AIC from the top model that were averaged using the R package MuMIn. See manuscripts for details on covariate descriptions and modeling procedure.

### Provisioning

| Model terms                                | df | Log likelihood | AIC     | Delta AIC | Weight | R <sup>2</sup> |
|--------------------------------------------|----|----------------|---------|-----------|--------|----------------|
| Body condition, Season                     | 5  | 154.71         | -299.42 | 0         | 0.28   | 0.17           |
| Ectoparasite score                         | 4  | 153.34         | -298.68 | 0.75      | 0.20   | 0.15           |
| Ectoparasite score, Body condition, Season | 6  | 154.92         | -297.84 | 1.58      | 0.13   | 0.18           |
| Season                                     | 4  | 152.68         | -297.36 | 2.07      | 0.10   | 0.15           |
| Null                                       | 3  | 151.50         | -297.00 | 2.42      | 0.08   | 0.13           |
| Body condition, Ectoparasite score         | 4  | 153.39         | -296.77 | 2.65      | 0.08   | 0.16           |
| Ectoparasite score, Season                 | 5  | 152.73         | -295.46 | 3.96      | 0.04   | 0.16           |

### Body condition

| Model terms                                                                | df | Log likelihood | AIC    | Delta AIC | Weight | R <sup>2</sup> |
|----------------------------------------------------------------------------|----|----------------|--------|-----------|--------|----------------|
| Age, Provisioned food, Season, Age*Season, Provisioned food*Season         | 11 | -244.12        | 510.24 | 0         | 0.42   | 0.25           |
| Age, Provisioned food, Season, Age*Season, Provisioned food*Season, Season | 14 | -241.99        | 511.98 | 1.74      | 0.17   | 0.27           |
| Age, Provisioned food, Season, Provisioned food*Season                     | 9  | -244.10        | 512.19 | 1.95      | 0.16   | 0.24           |
| Age, Provisioned food, Season, Age*Season                                  | 9  | -247.81        | 513.62 | 3.38      | 0.08   | 0.21           |
| Age, Provisioned food, Season                                              | 7  | -245.20        | 514.04 | 3.8       | 0.05   | 0.2            |

### Mass

| Model terms                                       | df | Log likelihood | AIC    | Delta AIC | Weight | R <sup>2</sup> |
|---------------------------------------------------|----|----------------|--------|-----------|--------|----------------|
| Provisioned food                                  | 4  | -256.65        | 521.30 | 0         | 0.57   | 0.17           |
| Age, Provisioned food                             | 5  | -256.87        | 523.74 | 2.44      | 0.17   | 0.18           |
| Provisioned food, Season, Provisioned food*Season | 8  | -254.09        | 524.19 | 2.89      | 0.13   | 0.19           |

### Ectoparasite intensity

| Model terms                                                        | df | Log likelihood | AIC    | Delta AIC | Weight | R <sup>2</sup> |
|--------------------------------------------------------------------|----|----------------|--------|-----------|--------|----------------|
| Provisioned food, Season, Provisioned food*Season                  | 8  | -240.22        | 496.44 | 0         | 0.23   | 0.19           |
| Provisioned food                                                   | 4  | -244.58        | 497.17 | 0.73      | 0.16   | 0.15           |
| Provisioned food, Season                                           | 6  | -242.63        | 497.25 | 0.81      | 0.15   | 0.17           |
| Provisioned food, Season, Age, Age*Season, Provisioned food*Season | 11 | -238.04        | 498.08 | 1.64      | 0.1    | 0.22           |
| Provisioned food, Season, Age, Age*Season                          | 9  | -240.52        | 499.04 | 2.60      | 0.06   | 0.16           |
| Age, Provisioned food, Season, Provisioned food*Season             | 9  | -241.01        | 500.01 | 3.58      | 0.05   | 0.17           |
| Age, Provisioned food                                              | 5  | -243.12        | 500.24 | 3.80      | 0.04   | 0.15           |
